# Supplementary material for: A multifunctional perylenediimide derivative (DTPDI) can be used as a recyclable specific Hg2+ ion sensor and an efficient DNA delivery carrier
Source: Royal Society of Chemistry journal article supplement (doi:10.1039/c3tb21801e), 2014-01-01
Supplement: c3tb21801e1.pdf [file c3tb21801e1.pdf]

## Supporting information

### **A multifunctional perylenediimide derivative as recyclable specific Hg<sup>2+</sup> ion sensor and efficient DNA delivery carrier**

Kelan Liu,<sup>a</sup> Zejun Xu,<sup>a</sup> Meizhen Yin,<sup>\*a</sup> Wantai Yang,<sup>a</sup>

Bicheng He,<sup>b</sup> Wei Wei<sup>b</sup> and Jie Shen<sup>\*b</sup>

<sup>a</sup> State Key Laboratory of Chemical Resource Engineering, Key Laboratory of Carbon Fiber and Functional Polymers, Ministry of Education, Beijing University of Chemical Technology, 100029 Beijing, China, Email: yinmz@mail.buct.edu.cn.

<sup>b</sup> Department of Entomology, China Agricultural University, 100193 Beijing, China, Email: shenjie@cau.edu.cn.

#### **Materials**

1, 6, 7, 12-Tetrachloroperylene-3, 4, 9, 10-tetracarboxylic acid dianhydride was obtained from Beijing Wenhaiyang Perylene Chemistry (Beijing, China). 4-Hydroxybenzaldehyde (98%) and 2-aminoethanethiol hydrochloride (>95.0%) were purchased from Alfa Aesar and TCI, respectively. All other solvents and reagents were purchased from commercial suppliers and used as received. S2 cells were propagated in Schneider Drosophila Medium supplemented with 10% FBS, 100 U/mL penicillin and 100 µg/mL streptomycin at 25 °C without CO<sub>2</sub>.

#### **Instruments**

Nuclear magnetic resonance (NMR) spectra were recorded on Bruker 400 (400 MHz <sup>1</sup>H; 101 MHz <sup>13</sup>C) spectrometer using D<sub>2</sub>O, CDCl<sub>3</sub> and MeOD as solvent at room temperature. Chemical shifts were reported downfield from 0.00 ppm using TMS as internal reference. Matrix-assisted laser-desorption ionization time-of-flight mass spectrometry (MALDI-TOF MS) were determined on AXIMA-CFR plus MALDI-TOF mass spectrometer. The UV-Vis absorption spectra were recorded on a

spectrophotometer (Cintra 20, GBC, and Australia). The corrected Fluorescence spectroscopic studies were performed on a fluorescence spectrophotometer (Horiba Jobin Yvon FluoroMax-4 NIR, NJ, USA) at room temperature (25 °C). Fluorescence quantum yields (FQYs) were measured at room temperature by using cresyl violet in methanol as reference ( $\Phi_f=0.54$ ).<sup>1</sup>

### **Cytotoxicity Assay**

Cell viability was monitored using Tali™ viability kit-Dead Cell Green (Invitrogen, Catalog A10787) that was a green-fluorescent nuclear and chromosome stain. It does not penetrate intact membranes, but easily penetrate compromised membranes characteristic of dead cells. The measurement was performed at 48 h post-incubation of **DTPDI**. Replace the fresh cell medium after 48 h of incubation and then add 1  $\mu$ L Dead Cell Green into 100  $\mu$ L cell medium for 0.5 h incubation.

### **Cellular Hg<sup>2+</sup> response**

HeLa cells were purchased from Gibco by Life Technologies. HeLa cells were incubated in Dulbeccos Modified Eagle Medium (DMEM 1X) which was supplemented with 10% fetal bovine serum (FBS, GIBCO) and 1% penicillin streptomycin (PS). Cells were grown onto 35 mm  $\times$  35 mm cell culture dish at a density of  $1 \times 10^5$  cells/well at 37 °C under 5% CO<sub>2</sub>. After 2 days, two groups of cells were incubated with **DTPDI** (2.5  $\mu$ M) for 2 h and then washed three times with Phosphate Buffered Saline(PBS) to remove excess probe, and one group of cells were incubated with Hg<sup>2+</sup> (7  $\mu$ M) for 2 h and then washed with the PBS buffer to remove excess Hg<sup>2+</sup>. Then added the fresh cell culture media (DMEM 1X) and observed the cell imaging under the fluorescence microscopy.

### **Cellular Uptake**

HeLa cells were purchased from Gibco by Life Technologies. HeLa cells were incubated in Dulbeccos Modified Eagle Medium (DMEM 1X) which was supplemented with 10% fetal bovine serum (FBS, GIBCO) and 1% penicillin

streptomycin (PS). Cellular uptake experiment was performed in 35 mm × 35 mm cell culture dish, 2.5×10<sup>5</sup> cells per well. After 8 h of cell seeding, making the HeLa cells adhere to the bottom of the dish, add the **DTPDI** to the cell culture dish. Cellular uptake was imaged by fluorescence microscope. The fluorescence intensity of **DTPDI** inside cells was calculated by Image-J Program.

### ***In vitro* Transfection Efficiency**

*Drosophila* S2 cells were propagated in Schneider's *Drosophila* Medium (Sigma) supplemented with 10% FBS, 100 U/mL penicillin and 100 µg/mL streptomycin at 25 °C without CO<sub>2</sub>. Single-strand DNA (20 bp, 100 µM) was labeled with 30 µM CXR Reference Dye (Promega, Catalog C5411) that could bind with DNA at a final concentration of 0.3-0.5 µM. DNA and **DTPDI** at different N/P ratios of 4:1, 8:1 and 16:1 were pre-incubated in culture medium at room temperature and then treated with cells. The fluorescence images of the distribution of **DTPDI** and DNA were obtained under a fluorescence microscope.

### ***In vivo* Transfection assay**

Immediately after hatching from eggs, Black Cutworm larvae were picked out and individually fed with an artificial diet mixed with dsRNA alone or complex of **DTPDI**/dsRNA. dsRNA targeting *wg* was synthesized using T7 RiboMAX expression RNAi system (Promega). For oral feeding, 4 µg of dsRNA was mixed with 4 µg of **DTPDI**, and then mixed with 16 mg of fresh artificial diet. The newly-hatched larvae were individually fed with above diet. The larvae fed with dsRNA alone were used as controls. After 6 days, dsRNA-contained food was replaced with fresh normal food. Then photos were taken for comparison.

The sequence of *wg*-dsRNA is:

```
TGACAACATTGGCTTCGGCTTCCGATTGAGCAGAGAATTCGTCGACACCGGAGAAAG
AGGCAAAACCCTCAGAGAAAAAATGAACCTACACAACAACGAAGCCGGCCGAGCGC
ACGTGCAAACGGAGATGCGCCAGGAGTGCAAGTGCCACGGCATGTCAGGCTCGTGCA
CAGTCAAGACCTGTTGGATGAGGCTGCCCAGCTTCCGCTCCGTGGGCGACTCACTGA
AGGACCGGTTTCGACGGCGCGTCCCGGGTCATGATGCCTAACACTGACCTGGAACCGC
CAGCGCAGCGGAACGACGCGGCCACACAGAGTGCCGCGAAGAGACCGATAACCGG
```

TTTCAACTGCGACCTCACAATCCTGACCATAAATCGCCGGGGGCGAAAGACTTGGTCT  
ACCTAGAATCATCGCCGGGTTTCTGTGAAAAGAACCCGAGGCTGG

The primers for dsRNA synthesis are:

FT7: TAATACGACTCACTATAGGTGACAACATTGGCTTCGG

RT7: TAATACGACTCACTATAGGCCAGCCTCGGGTTC

## Synthesis Schemes

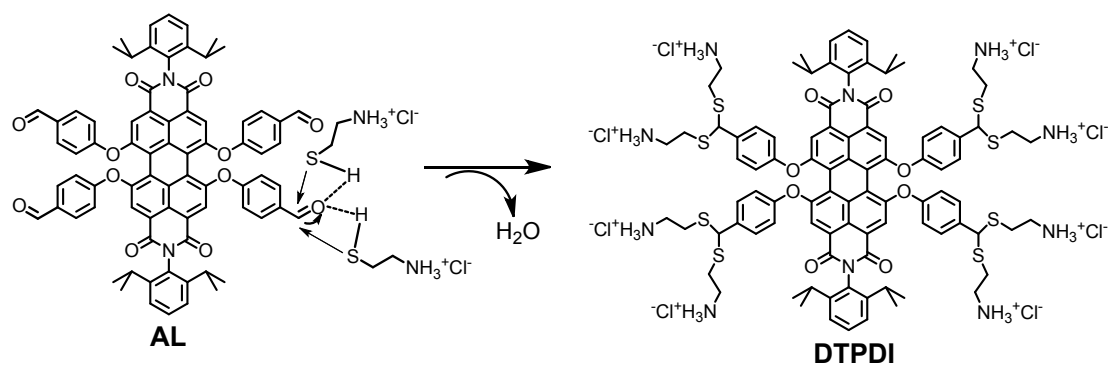

**Scheme S1.** The mechanism for the conversion of **AL** to **DTPDI**

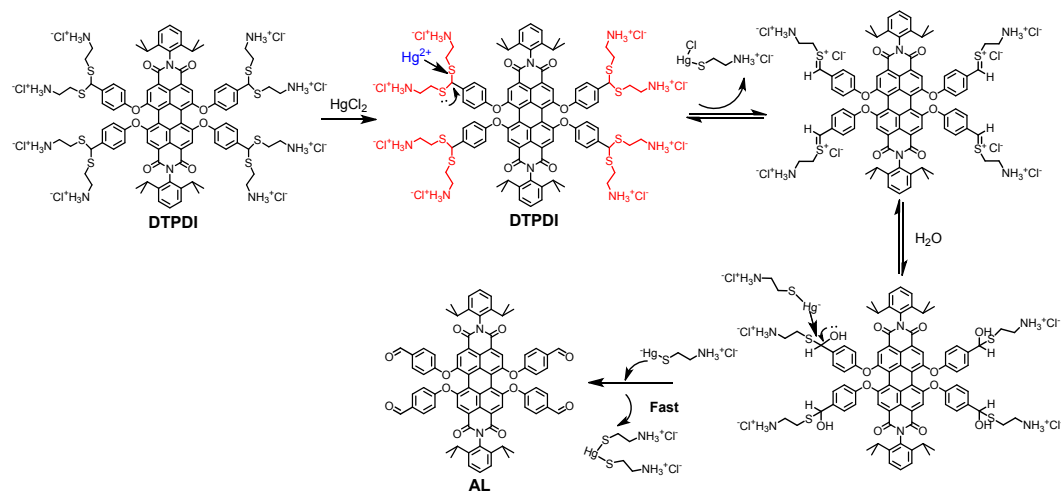

**Scheme S2**  $\text{Hg}^{2+}$ -promoted conversion mechanism of **DTPDI** to aldehyde **AL** in presence of  $\text{HgCl}_2$

## UV-Vis Absorption and Fluorescence Emission Properties

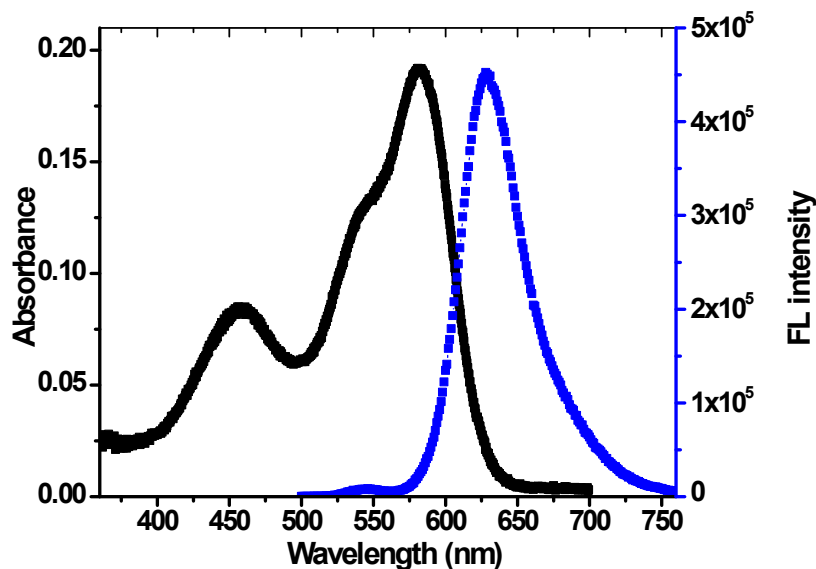

**Fig. S1** UV-vis absorption and fluorescence ( $\lambda_{\text{ex}} = 450 \text{ nm}$ ) of **DTPDI** (5  $\mu\text{M}$ ) in distilled water.

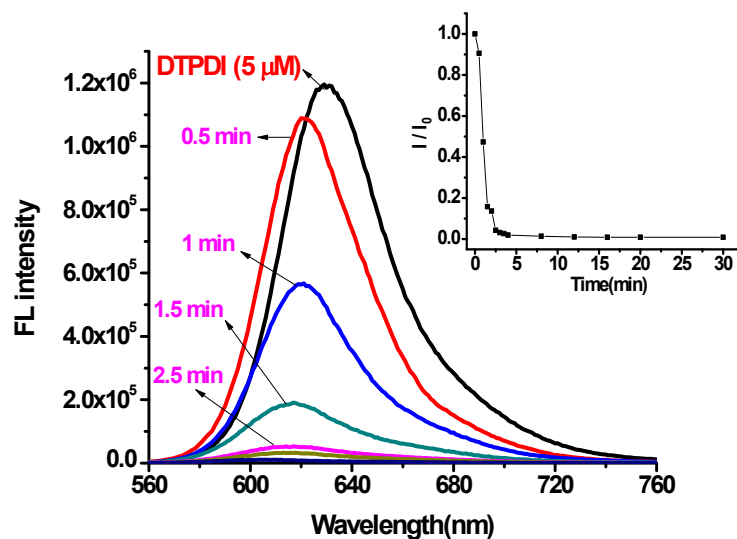

**Fig. S2** Fluorescence changes of **DTPDI** (5  $\mu\text{M}$ ) upon addition of  $\text{Hg}^{2+}$  (10 eq) in distilled water from 0 min to 30 min ( $\lambda_{\text{ex}} = 450 \text{ nm}$ ). Inset: Plot of the intensity maximum of **DTPDI** versus  $\text{Hg}^{2+}$  (10 eq) at different time.

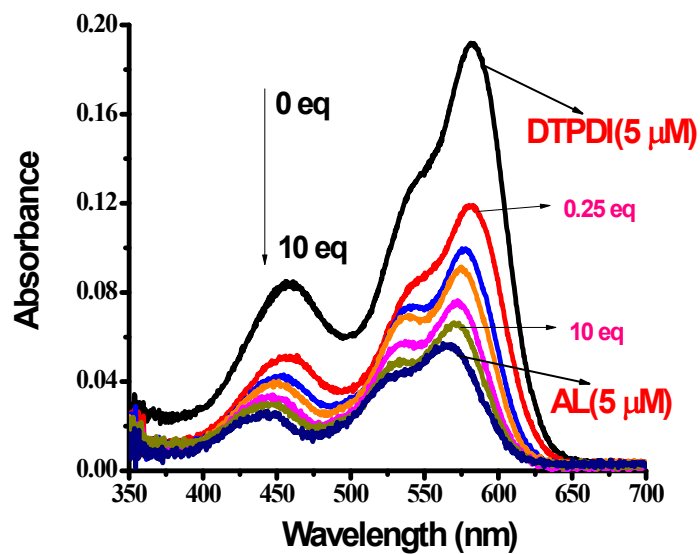

**Fig. S3** UV-vis absorption changes of **DTPDI** (5  $\mu\text{M}$ ) upon addition of  $\text{Hg}^{2+}$  (0 - 10 eq) in distilled water

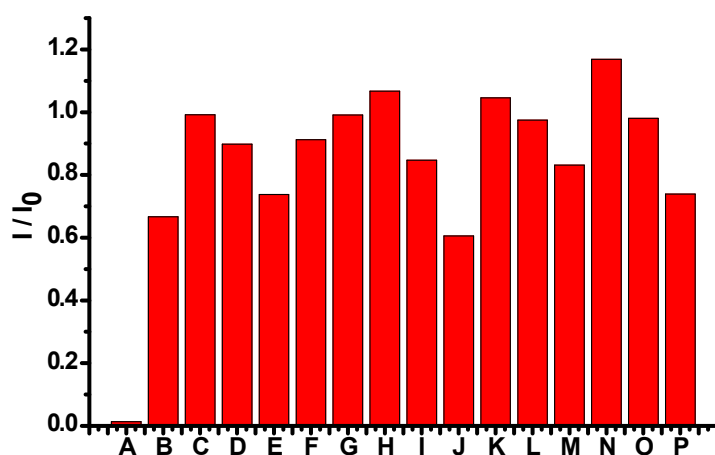

**Fig. S4** Fluorescence intensity ratio ( $I_0/I$ ) of **DTPDI** (5  $\mu\text{M}$ ) in distilled water at 25  $^{\circ}\text{C}$  upon addition of 10 eq of different metal ions, measured after 2 min ( $\lambda_{\text{ex}} = 450$  nm): (A)  $\text{Hg}^{2+}$ , (B)  $\text{Fe}^{2+}$ , (C)  $\text{Na}^{+}$ , (D)  $\text{K}^{+}$ , (E)  $\text{Zn}^{2+}$ , (F)  $\text{Cu}^{+}$ , (G)  $\text{Cu}^{2+}$ , (H)  $\text{Fe}^{3+}$ , (I)  $\text{Ca}^{2+}$ , (J)  $\text{Mg}^{2+}$ , (K)  $\text{Cr}^{2+}$ , (L)  $\text{Mn}^{2+}$ , (M)  $\text{Cd}^{2+}$ , (N)  $\text{Pb}^{2+}$ , (O)  $\text{Ni}^{2+}$ , (P)  $\text{Ag}^{+}$ .

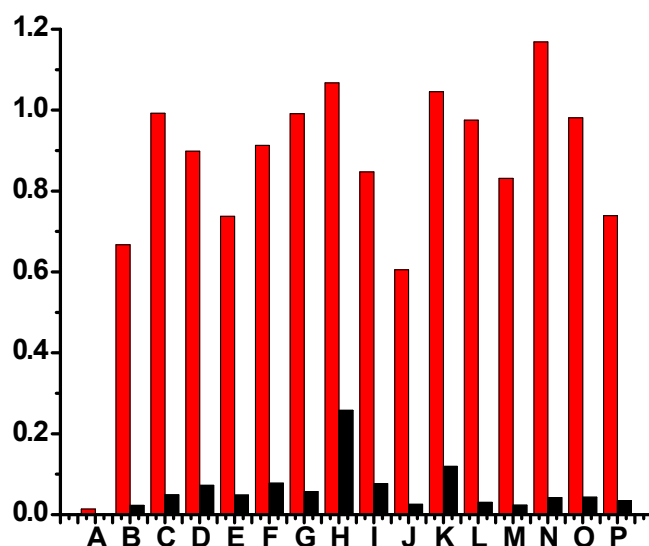

**Fig. S5** Fluorescence intensity ratio ( $I_0/I$ ) of **DTPDI** (5  $\mu\text{M}$ ) of the competition experiments upon addition of each metal ion (200  $\mu\text{M}$ , red bars) followed by  $\text{Hg}^{2+}$  (200  $\mu\text{M}$ , black bars) in water at 25  $^{\circ}\text{C}$ , measured after 2 min ( $\lambda_{\text{ex}} = 450 \text{ nm}$ ): (A)  $\text{Hg}^{2+}$ , (B)  $\text{Fe}^{2+}$ , (C)  $\text{Na}^+$ , (D)  $\text{K}^+$ , (E)  $\text{Zn}^{2+}$ , (F)  $\text{Cu}^+$ , (G)  $\text{Cu}^{2+}$ , (H)  $\text{Fe}^{3+}$ , (I)  $\text{Ca}^{2+}$ , (J)  $\text{Mg}^{2+}$ , (K)  $\text{Cr}^{2+}$ , (L)  $\text{Mn}^{2+}$ , (M)  $\text{Cd}^{2+}$ , (N)  $\text{Pb}^{2+}$ , (O)  $\text{Ni}^{2+}$ , (P)  $\text{Ag}^+$ .

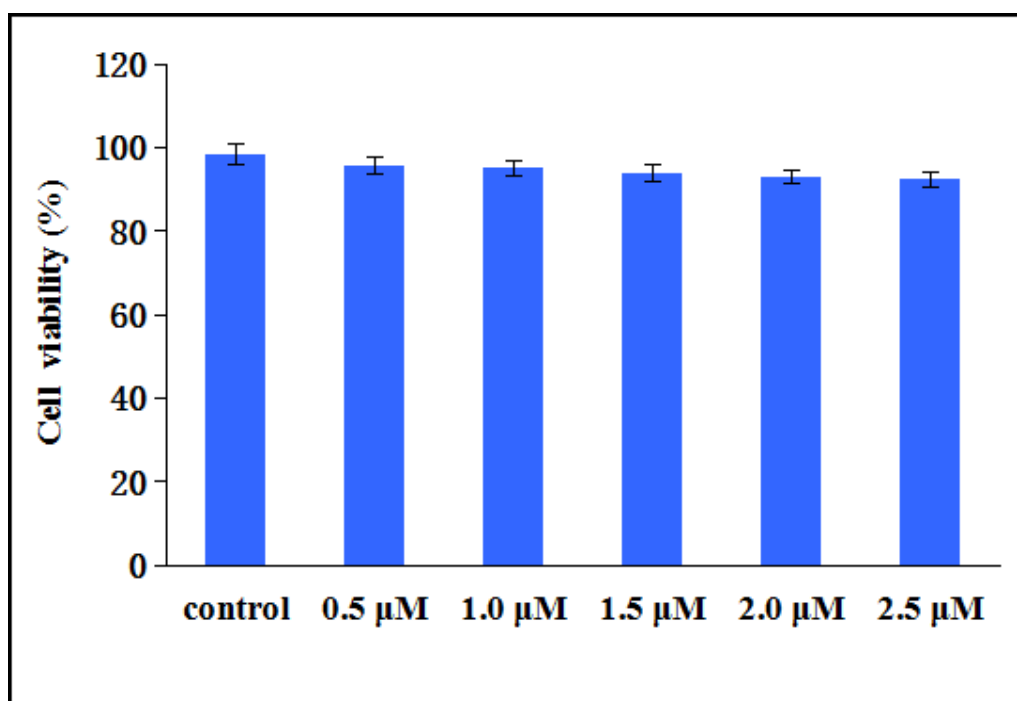

**Fig. S6** Cell viability of cells treated with **DTPDI** at various concentrations for 48 h. The data were mean $\pm$ SEM.

The DNA-binding affinity of “**DTPDI**” in water was determined using an isothermal titration calorimetry (ITC) as well as agarose gel electrophoresis. The association constant ( $K_a$  of “**DTPDI**” / DNA) is  $1.153 \times 10^6 \text{ M}^{-1}$  (Fig. S7). “**DTPDI**” could compact DNA completely at a N : P ratio of above 1 (Fig. S8). These data demonstrate the interactions between “**DTPDI**” and DNA.

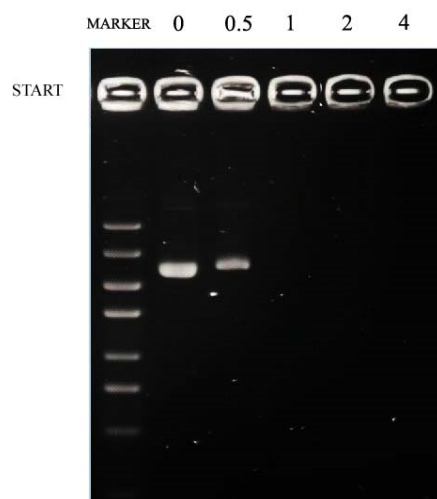

**Fig. S7** Agarose gel Electrophoresis of pDNA/**DTPDI** complexes at various N : P ratios.

## Synthesis and characterizations

### 1. Synthesis of AL

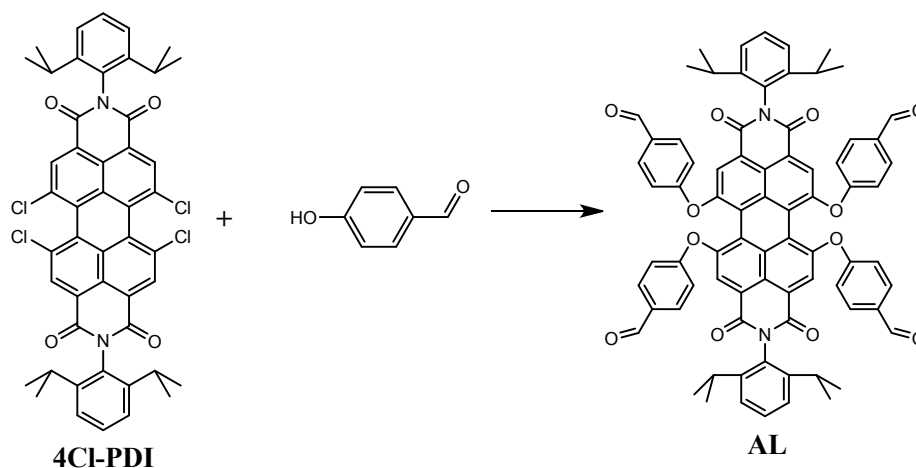

**Scheme S3** Synthesis approach for **AL**

Under an atmosphere of argon, **4Cl-PDI** (0.1698 g, 0.2 mmol), 4-hydroxybenzaldehyde (0.244 g, 2 mmol) and  $K_2CO_3$  (0.11 g, 0.8 mmol) were added into NMP (20 mL) with stirring. The reaction was carried out 80 °C under stirring for 36 h. After cooled down to room temperature, the mixture solution was treated with diluted hydrochloric acid and filtered to remove excess 4-hydroxy benzaldehyde. The residue was dissolved in dichloromethane and then washed with distilled water until the solution was neutral. The solvent was removed under reduced pressure, then the solid was purified by column chromatography with dichloromethane as the eluting solvent to give a reddish black solid **AL** (0.119 g, 50%).  $^1H$  NMR (400 MHz,  $CDCl_3$ )  $\delta$  9.95 (s, 4H), 8.35 (s, 4H), 7.85 (d,  $J$  = 8.7 Hz, 8H), 7.48 (t,  $J$  = 7.8 Hz, 2H), 7.32 (d,  $J$  = 7.8 Hz, 4H), 7.09 (d,  $J$  = 8.6 Hz, 8H), 2.70 (dt,  $J$  = 13.6, 6.8 Hz, 4H), 1.15 (d,  $J$  = 6.8 Hz, 24H).  $^{13}C$  NMR (101 MHz,  $CDCl_3$ )  $\delta$  190.37, 162.66, 160.29, 154.91, 145.49, 132.97, 132.07, 130.02, 129.81, 124.10, 123.74, 121.76, 121.35, 119.66, 29.44, 24.02. MS (MALDI-TOF,  $m/z$ ) Calc. for  $C_{76}H_{58}N_2O_{12}$ : 1191.28, found: 1192.547 ( $M+H^+$ ).

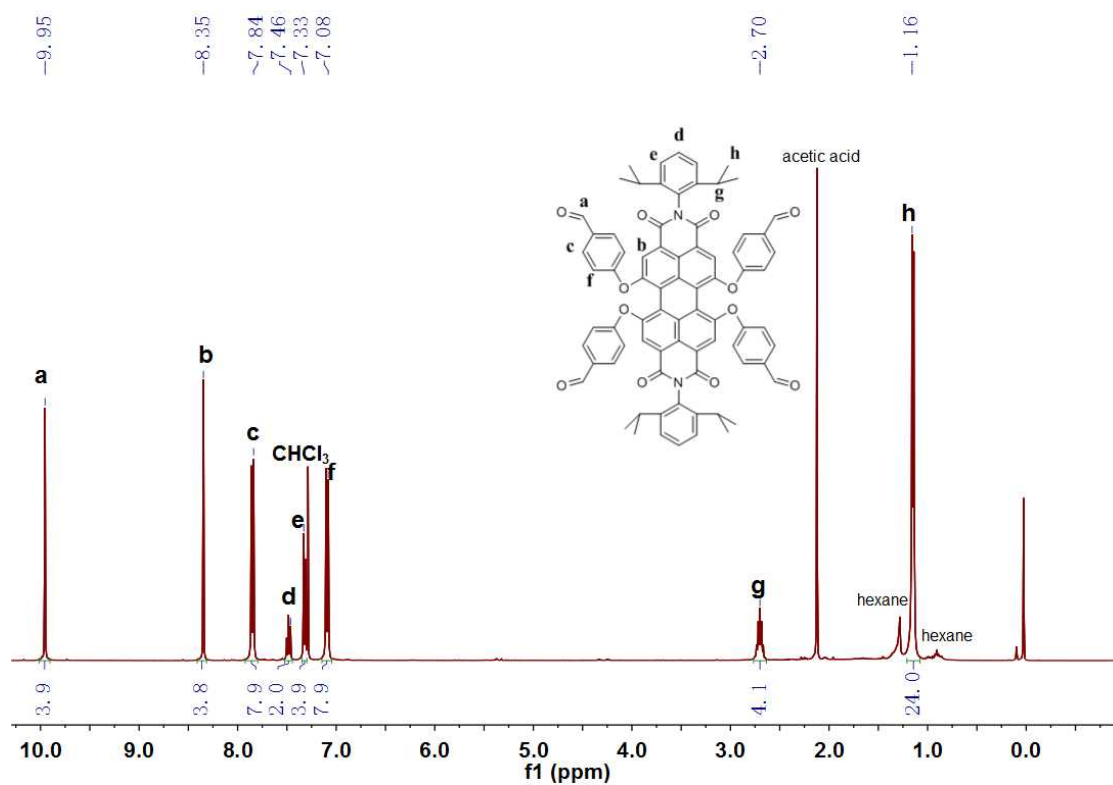

Fig. S8 <sup>1</sup>H NMR spectrum of AL in CDCl<sub>3</sub>

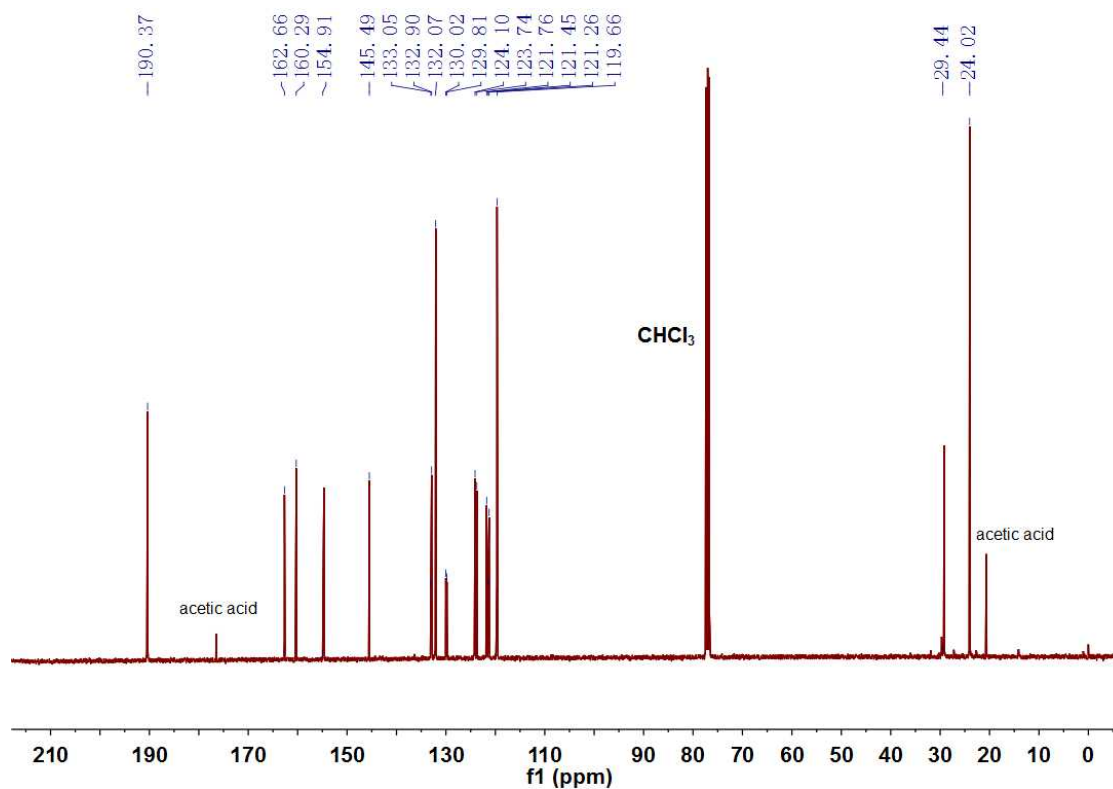

Fig. S9 <sup>13</sup>C NMR spectrum of AL in CDCl<sub>3</sub>

## 2. Synthesis of DTPDI

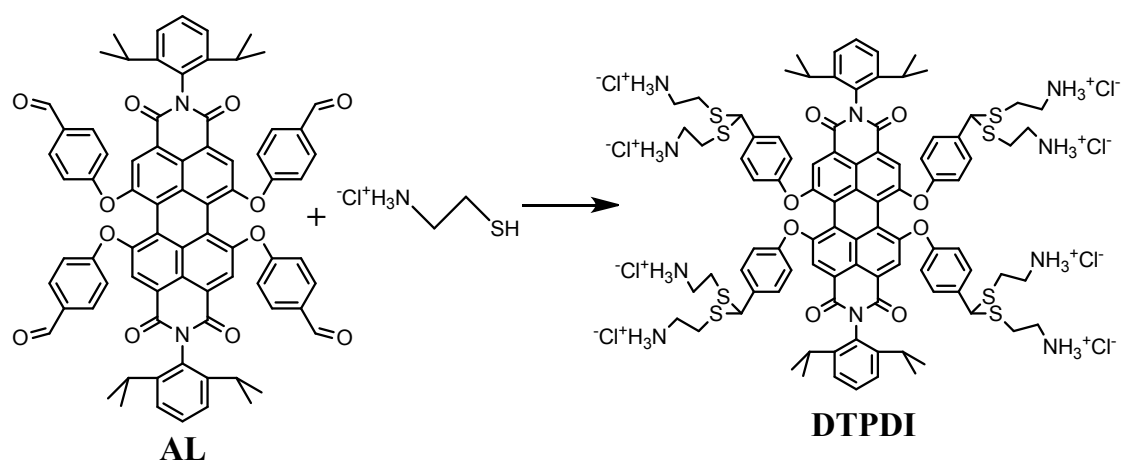

**Scheme S4** Synthesis approach for **DTPDI**

A solution of  $\text{BF}_3 \cdot \text{Et}_2\text{O}$  (102 mg, 0.72 mmol) in dry dichloromethane (3 mL) was slowly added into a mixture solution of **AL** (39 mg, 0.033 mmol) and 2-aminoethanethiol hydrochloride (63 mg, 0.55 mmol) in DMF (3 mL) under nitrogen atmosphere at 0 °C. After one day, the temperature of reaction was raised to 37 °C. After stirred for 4 days at 37 °C, the solution was redissolved in deionized water (0.5 mL) and washed with diethyl ether for several times. The further dialysis in 1 mM HCl and lyophilization afforded a purple solid **AL**. Yield: 96.5 %.  $^1\text{H}$  NMR (400 MHz,  $\text{D}_2\text{O}$ )  $\delta$  8.21 (s, 4H), 7.43 (d,  $J = 40.5$  Hz, 16H), 7.02 (s, 6H), 5.19 (s, 4H), 2.86 (dd,  $J = 116.4, 65.5$  Hz, 36H), 1.01 (s, 24H).  $^{13}\text{C}$  NMR (101 MHz, MeOD)  $\delta$  165.01, 157.38, 156.64, 147.20, 137.90, 134.48, 131.77, 131.15, 130.81, 125.18, 123.96, 122.27, 121.60, 121.20, 52.87, 40.31, 30.72, 30.36, 24.33. MS (MALDI-TOF,  $m/z$ ) Calc. for  $\text{C}_{92}\text{H}_{106}\text{N}_{10}\text{O}_8\text{S}_8$ : 1736.41, found: 1736.91 ( $\text{M}+\text{H}^+$ ).

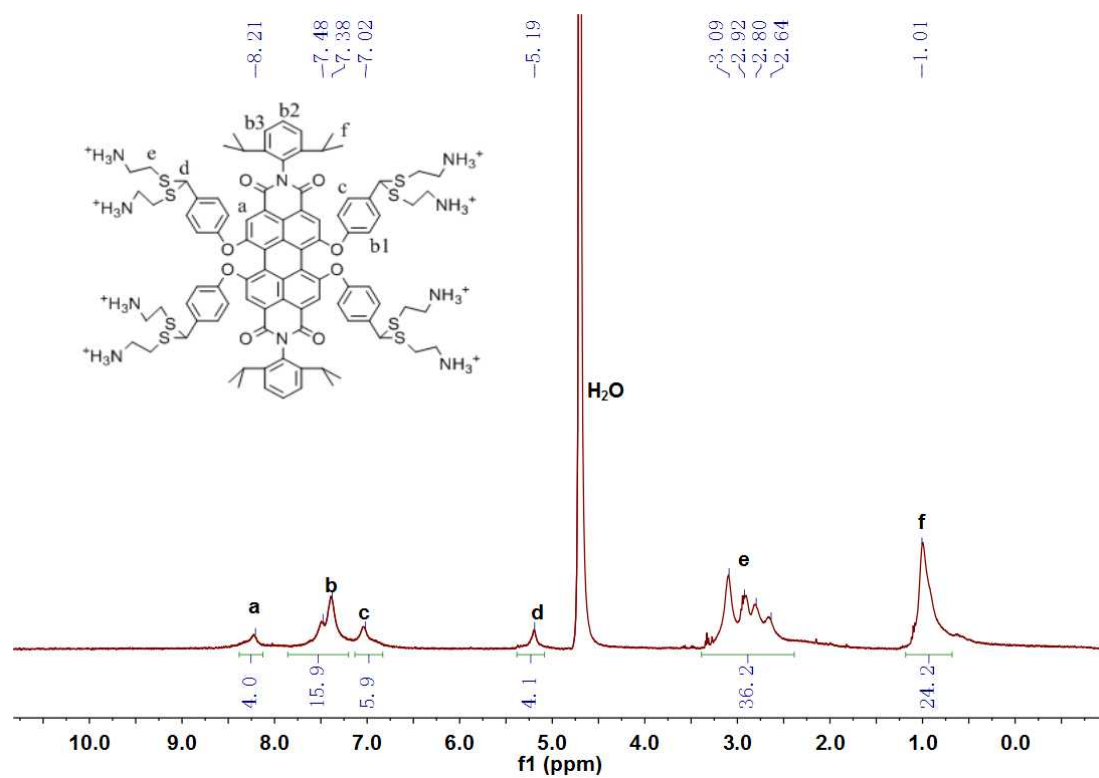

**Fig. S10**  $^1\text{H}$  NMR spectrum of **DTPDI** in  $\text{D}_2\text{O}$

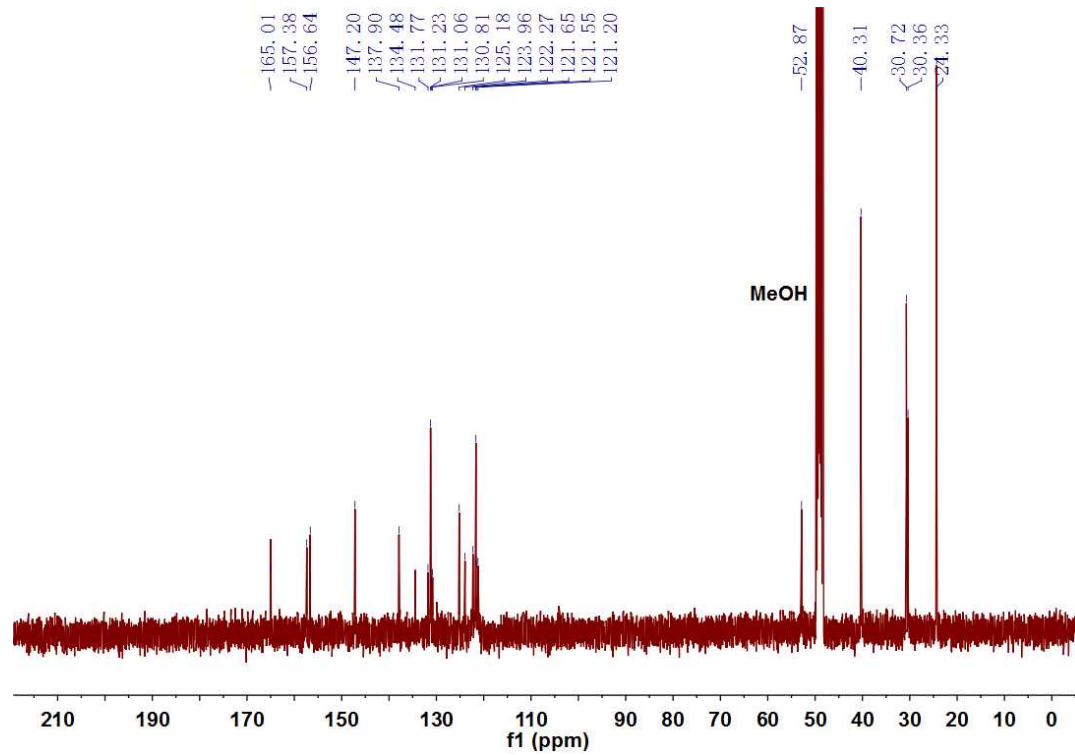

**Fig. S11**  $^{13}\text{C}$  NMR spectrum of **DTPDI** in  $\text{MeOD}$

---

<sup>1</sup> C. Kohl, T. Weil, J. Qu and K. Müllen, *Chem. Eur. J.*, 2004, **10**, 5297.
